# Supplementary material for: Selective and Efficient Synthesis of Pine Sterol Esters Catalyzed by Deep Eutectic Solvent
Source: MDPI journal article supplement (doi:10.3390/molecules28030993), 2023-01-19
Supplement: s1 [file s1]

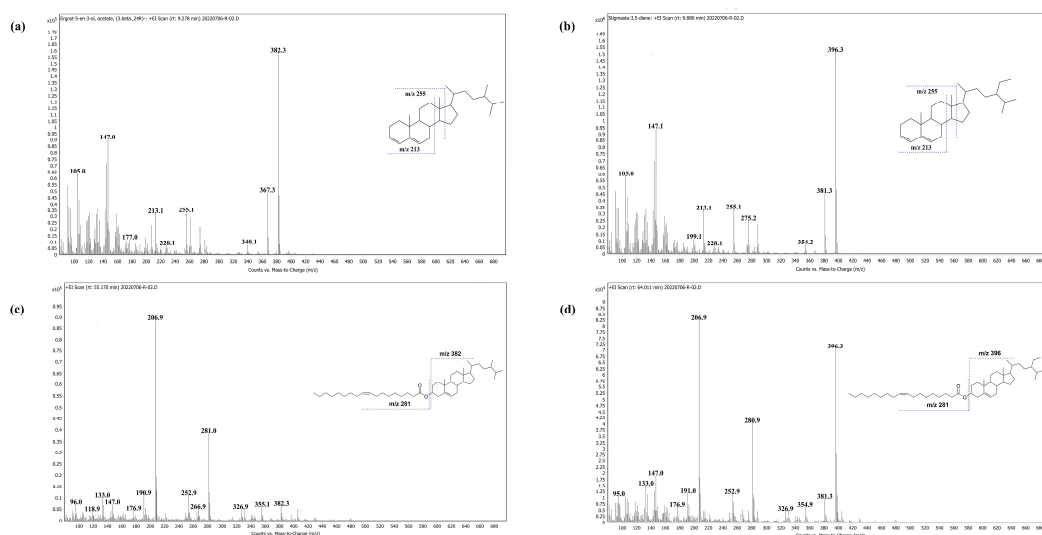

Figure S1. MS spectra of the products and dehydrated sterols. a: the MS spectra of campesterol oleate; b: the MS spectra of  $\beta$ -Sitosterol oleate; c: the MS spectra of dehydration products of campesterol (ergosta-3,5-diene); d: the MS spectra of dehydration products of dehydrated product of  $\beta$ -sitosterol (stigma-3,5-diene).

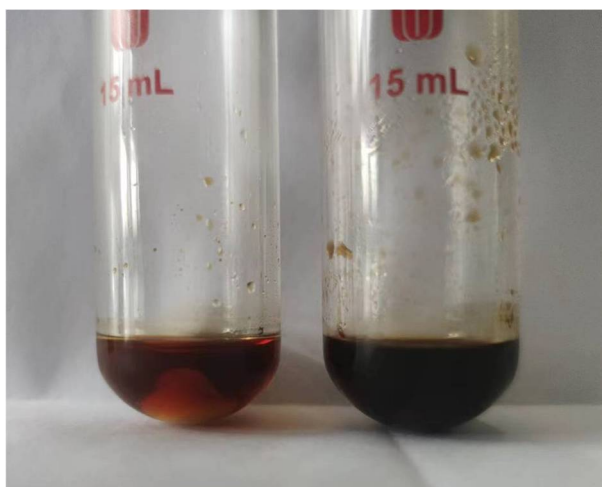

Figure S2. The sterol ester synthesis process. a: Catalyst: ChCl:PTSA (1:3); b: Catalyst: PTSA.

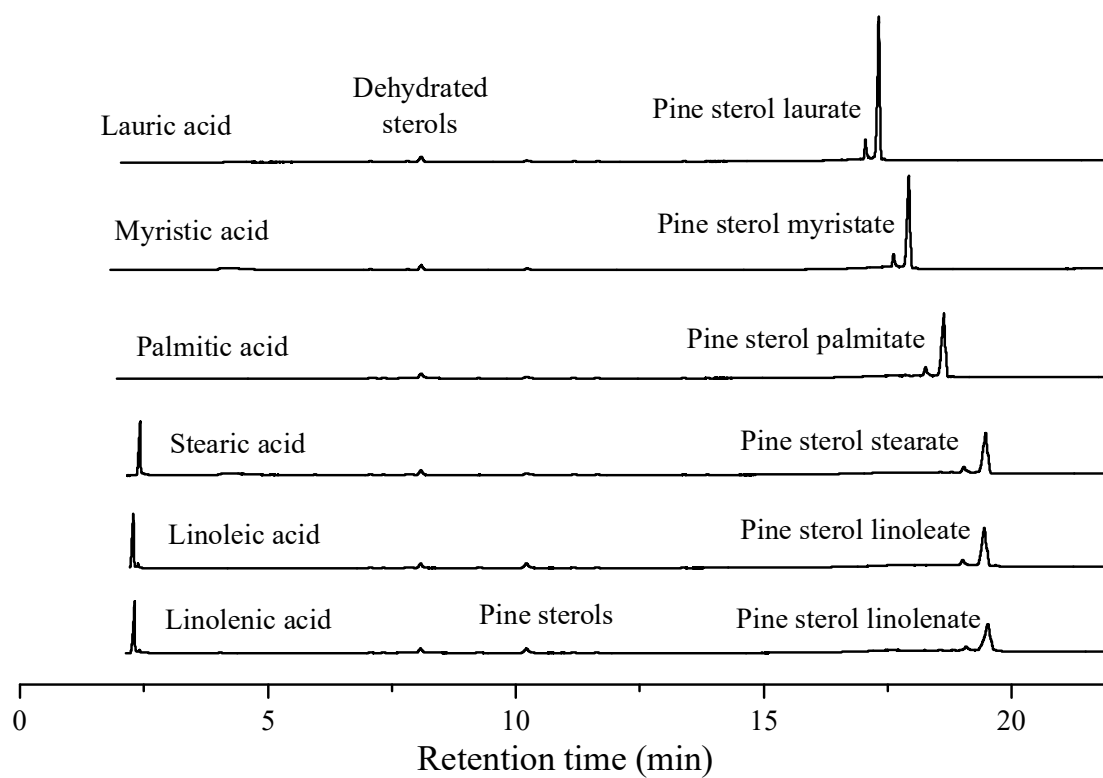

Figure S3. Gas chromatogram of reaction mixture when different fatty acids are used as acyl donors. Reaction conditions: 2 mmol pine sterols, 3 mmol fatty acid, 1.5% catalyst (based on the mass of pine sterols), 120 °C, 3 h.

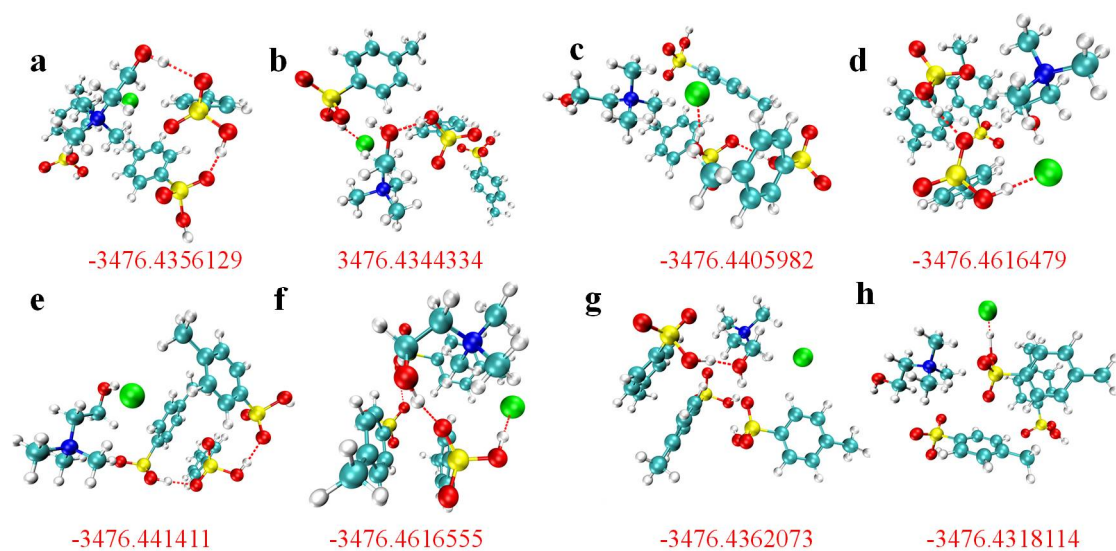

Figure S4. The possible geometries of ChCl/PTSA (1:3) optimized via B3LYP(gd3bj)/6-31g(d,p) method. The single point energy of these geometries was labeled in red color and the unit is Hartree.

Table S1. The raw GC data of each entry in Table 1 <sup>a</sup>

| Entries | DESs                         | Peak area          |              |                    | Sampling amount (mg) |
|---------|------------------------------|--------------------|--------------|--------------------|----------------------|
|         |                              | Dehydrated sterols | Pine sterols | Pine sterol esters |                      |
| 1       | ChCl/ZnCl <sub>2</sub> (1:2) | 93.4               | 1325         | 635.4              | 33.1                 |
| 2       | ChCl/SnCl <sub>2</sub> (1:2) | 127.9              | 922          | 883.7              | 32.0                 |
| 3       | ChCl/BEN (1:1)               | 58.3               | 827          | 612.5              | 25.0                 |
| 4       | ChCl/OA (1:1)                | 128                | 1782         | 1084               | 49.0                 |
| 5       | ChCl/CA (1:1)                | 95.7               | 1357.7       | 631                | 33.6                 |
| 6       | ChCl/Urea (1:2)              | 88.5               | 1135         | 453.6              | 26.9                 |
| 7       | ChCl/HL (1:2)                | 76.8               | 1261.3       | 761.5              | 34.7                 |
| 8       | ChCl/SSA (1:2)               | 148                | 119          | 1534               | 31.3                 |
| 9       | ChCl/PTSA (1:2)              | 673.7              | 12.3         | 1132.1             | 32.0                 |
| 10      | ChCl/SSA (1:2) <sup>b</sup>  | 109.4              | 448.1        | 1105               | 28.3                 |
| 11      | ChCl/PTSA (1:2) <sup>b</sup> | 144.1              | 109          | 1609.4             | 31.9                 |
| 12      | TBAC/PTSA (1:2) <sup>b</sup> | 87.3               | 186.1        | 1586               | 33.2                 |
| 13      | TBAB/PTSA (1:2) <sup>b</sup> | 117.9              | 141.2        | 1129.3             | 24.2                 |
| 14      | ChCl/PTSA (1:3) <sup>b</sup> | 149                | 59.6         | 1808               | 35.3                 |
| 15      | ChCl/PTSA (1:4) <sup>b</sup> | 156.6              | 55           | 1625.5             | 31.7                 |
| 16      | PTSA <sup>b</sup>            | 164.1              | 33           | 1174.5             | 24.3                 |
| 17      | PTSA <sup>c</sup>            | 140.5              | 31.9         | 1059.8             | 21.9                 |

Reaction conditions: <sup>a</sup> 2 mmol pine sterols, 4 mmol oleic acid, 7% catalyst (based on the mass of pine sterols), 120 °C, 5 h. <sup>b</sup> 2 mmol pine sterols, 4 mmol oleic acid, 1% catalyst (based on the mass of pine sterols), 120 °C, 5 h. <sup>c</sup> 2 mmol pine sterols, 4 mmol oleic acid, the amount added is the same as the amount of PTSA in 1% ChCl/PTSA (1:3), 120 °C, 5 h.

The external standard curve equations: Dehydrated sterols:  $y=764.91x+49.758$ ; Pine sterols:  $y=769.11x+9$ ; Pine sterol oleate:  $y=413.74-45.706$ . (y represents the peak area and x represents the mass concentration of the substance in the sample).

Table S2. The coordinate of Figure S4f

|   |         |         |         |
|---|---------|---------|---------|
| C | 2.9933  | 0.5574  | 2.9542  |
| C | 1.6939  | 0.6158  | 2.428   |
| C | 1.1694  | -0.4364 | 1.6864  |
| C | 1.957   | -1.5668 | 1.47    |
| C | 3.2442  | -1.6642 | 1.9928  |
| C | 3.7529  | -0.5982 | 2.7321  |
| C | 3.5603  | 1.7295  | 3.711   |
| S | 1.3296  | -2.8986 | 0.4752  |
| O | 0.4567  | -3.7941 | 1.4402  |
| O | 0.4524  | -2.2751 | -0.5461 |
| O | 2.4462  | -3.7183 | 0.0113  |
| H | 1.096   | 1.5074  | 2.591   |
| H | 0.1668  | -0.3888 | 1.2834  |
| H | 3.8364  | -2.5526 | 1.8039  |
| H | 4.7583  | -0.662  | 3.1393  |
| H | 2.8288  | 2.1373  | 4.4169  |
| H | 4.4576  | 1.4495  | 4.2708  |
| H | 3.8276  | 2.531   | 3.0129  |
| H | -0.3549 | -3.2768 | 1.8632  |
| C | -3.4817 | 1.0662  | 2.6128  |
| C | -2.1107 | 1.1647  | 2.317   |
| C | -1.6702 | 1.7785  | 1.152   |
| C | -2.613  | 2.3123  | 0.2666  |
| C | -3.9765 | 2.2479  | 0.5394  |
| C | -4.3988 | 1.6232  | 1.7148  |
| C | -3.9294 | 0.3471  | 3.8565  |
| S | -2.0839 | 2.913   | -1.3233 |
| O | -1.0774 | 4.1245  | -0.9823 |
| O | -1.3148 | 1.8307  | -1.9615 |
| O | -3.221  | 3.5019  | -2.0164 |
| H | -1.3927 | 0.7113  | 2.9927  |
| H | -0.6135 | 1.8259  | 0.9168  |
| H | -4.6857 | 2.6739  | -0.1617 |
| H | -5.4616 | 1.5639  | 1.934   |
| H | -3.539  | 0.8383  | 4.7558  |
| H | -5.0205 | 0.3181  | 3.9336  |
| H | -3.5419 | -0.6786 | 3.8513  |
| H | -0.2049 | 3.7642  | -0.6742 |
| C | 2.7714  | -1.2634 | -2.4944 |
| C | 1.7955  | -0.3215 | -2.8516 |
| C | 1.7022  | 0.9062  | -2.208  |
| C | 2.6296  | 1.1981  | -1.2043 |

|    |         |         |         |
|----|---------|---------|---------|
| C  | 3.6243  | 0.2935  | -0.8316 |
| C  | 3.6799  | -0.9364 | -1.4783 |
| C  | 2.8265  | -2.6106 | -3.1636 |
| S  | 2.5305  | 2.7503  | -0.3715 |
| O  | 2.6915  | 3.8484  | -1.5784 |
| O  | 1.1578  | 2.9934  | 0.0971  |
| O  | 3.652   | 2.9019  | 0.5493  |
| H  | 1.0835  | -0.5706 | -3.631  |
| H  | 0.9134  | 1.604   | -2.4634 |
| H  | 4.3096  | 0.5387  | -0.0294 |
| H  | 4.4183  | -1.6691 | -1.1686 |
| H  | 3.6981  | -2.6845 | -3.8262 |
| H  | 2.9095  | -3.3993 | -2.4096 |
| H  | 1.9269  | -2.7931 | -3.7569 |
| H  | 3.644   | 3.9655  | -1.7571 |
| O  | -0.6576 | -2.6053 | -3.084  |
| C  | -1.6046 | -1.5626 | -3.1664 |
| C  | -2.9884 | -1.9162 | -2.6112 |
| N  | -3.0833 | -2.1056 | -1.1069 |
| C  | -2.3917 | -0.9733 | -0.3947 |
| C  | -4.5257 | -2.0777 | -0.699  |
| C  | -2.5106 | -3.4394 | -0.6881 |
| H  | -0.126  | -2.4936 | -2.2699 |
| H  | -1.2442 | -0.6283 | -2.7227 |
| H  | -1.7776 | -1.3575 | -4.2305 |
| H  | -3.6762 | -1.1015 | -2.8578 |
| H  | -3.3544 | -2.8423 | -3.0623 |
| H  | -2.5865 | -1.0757 | 0.6711  |
| H  | -1.3218 | -1.0494 | -0.5582 |
| H  | -2.7789 | -0.0418 | -0.7979 |
| H  | -4.5767 | -2.2975 | 0.3684  |
| H  | -5.0732 | -2.8292 | -1.2707 |
| H  | -4.9283 | -1.0826 | -0.8945 |
| H  | -3.1423 | -4.2202 | -1.1161 |
| H  | -1.4996 | -3.5217 | -1.0682 |
| H  | -2.5071 | -3.4729 | 0.4032  |
| Cl | -1.8343 | -2.4437 | 2.6171  |

### **The detailed experimental procedure of scaled-up experiments of catalyst recovery**

The experiments of catalyst recovery were carried out in 250 mL three-neck flasks equipped with a magnetic stirring bar to achieve better contact. The reaction was carried out under the optimal conditions: the molar ratio of oleic acid to pine sterols 1.5:1, 1.5% DES dose (based on the mass of pine sterols), reaction at 120°C for 2.5 h. In each reaction cycle, the amount of substrate added was ten times that of the original screening experiment: pine sterols (8.275 g, 0.02 mol), and oleic acid (8.483 g, 0.03 mol). After the reaction, the reaction mixture was transferred to a partition funnel and into an appropriate amount of hot water for extraction. The lower water layer was then concentrated in a rotary evaporator to obtain the DES catalyst, which was dried fully in a vacuum drying oven and used for the next cycle of the reaction.
